# Supplementary material for: Utilization of lead-based saturated adsorbents for the fabrication of battery-like hybrid asymmetric supercapacitors
Source: Royal Society of Chemistry journal article supplement (doi:10.1039/d3en00601h), 2024-01-01
Supplement: d3en00601h3.pdf [file d3en00601h3.pdf]

## Supporting File

### Utilization of Lead based saturated adsorbent for the fabrication of battery like hybrid asymmetric supercapacitor

Sourav Acharya<sup>a</sup>, Shrabani De<sup>a</sup>, Ayon Ganguly<sup>a</sup>, Brijesh K. Mishra<sup>\*,b</sup>, and Ganesh Chandra Nayak<sup>\*,a</sup>

<sup>a</sup>Department of Chemistry and Chemical Biology, Indian Institute of Technology (ISM), Dhanbad-826004 Jharkhand, India

<sup>b</sup>Department of Environmental Science and Engineering, Indian Institute of Technology (ISM), Dhanbad-826004 Jharkhand, India

\* E-mail Id of Corresponding authors: [gcnayak@iitism.ac.in](mailto:gcnayak@iitism.ac.in), [brijesh@iitism.ac.in](mailto:brijesh@iitism.ac.in)

#### S1. Synthesis of MnO<sub>2</sub>

MnO<sub>2</sub> was synthesized using a simple thermal treatment method [1]. In a typical process, MnCO<sub>3</sub> (Mn content 42-46 %, SRL India Pvt. Ltd.) was heated in a ceramic crucible at 300 °C for 12 hours in a muffle furnace in air to obtain pristine MnO<sub>2</sub>. This was used as the positive electrode in supercapacitor fabrication.

#### S2. Characterization of the samples

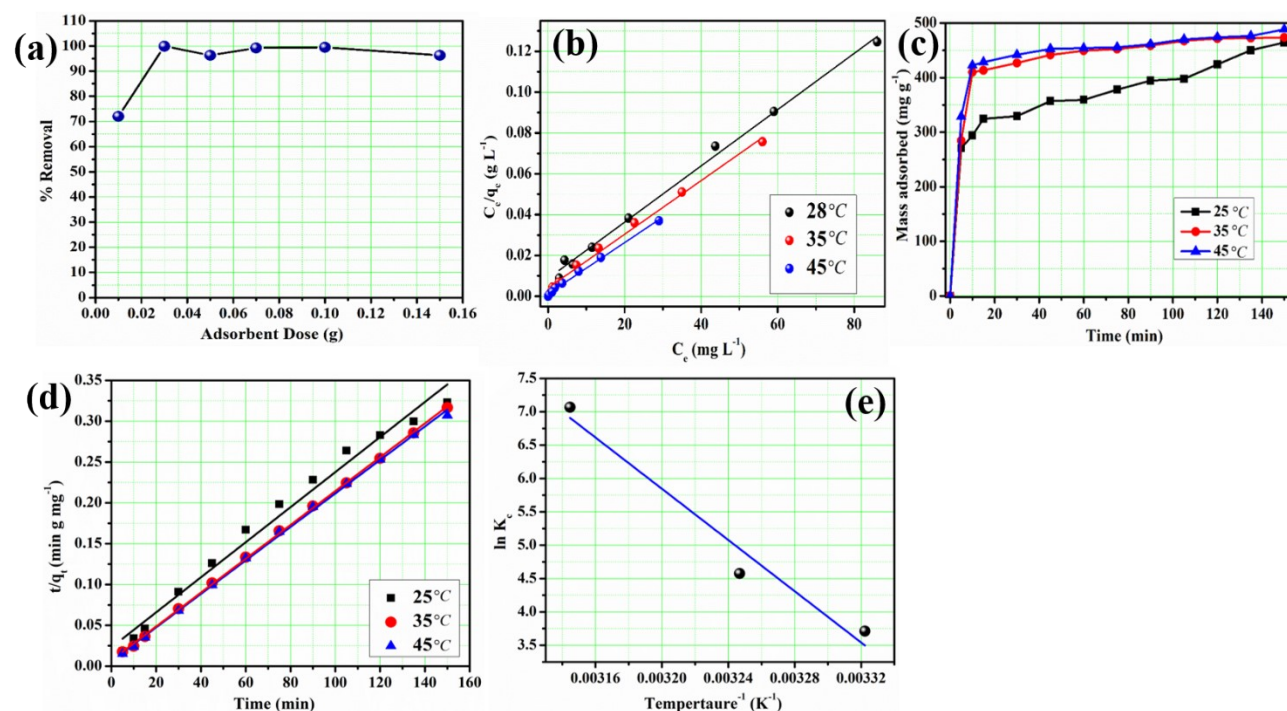

Figure S1: (a) Dose optimization, (b) Isotherm study, (c) Adsorption time with variation

in temperature, (d) Fit of adsorption data to second-order kinetics model, and (e) Thermodynamic parameters calculation of the Pb adsorption

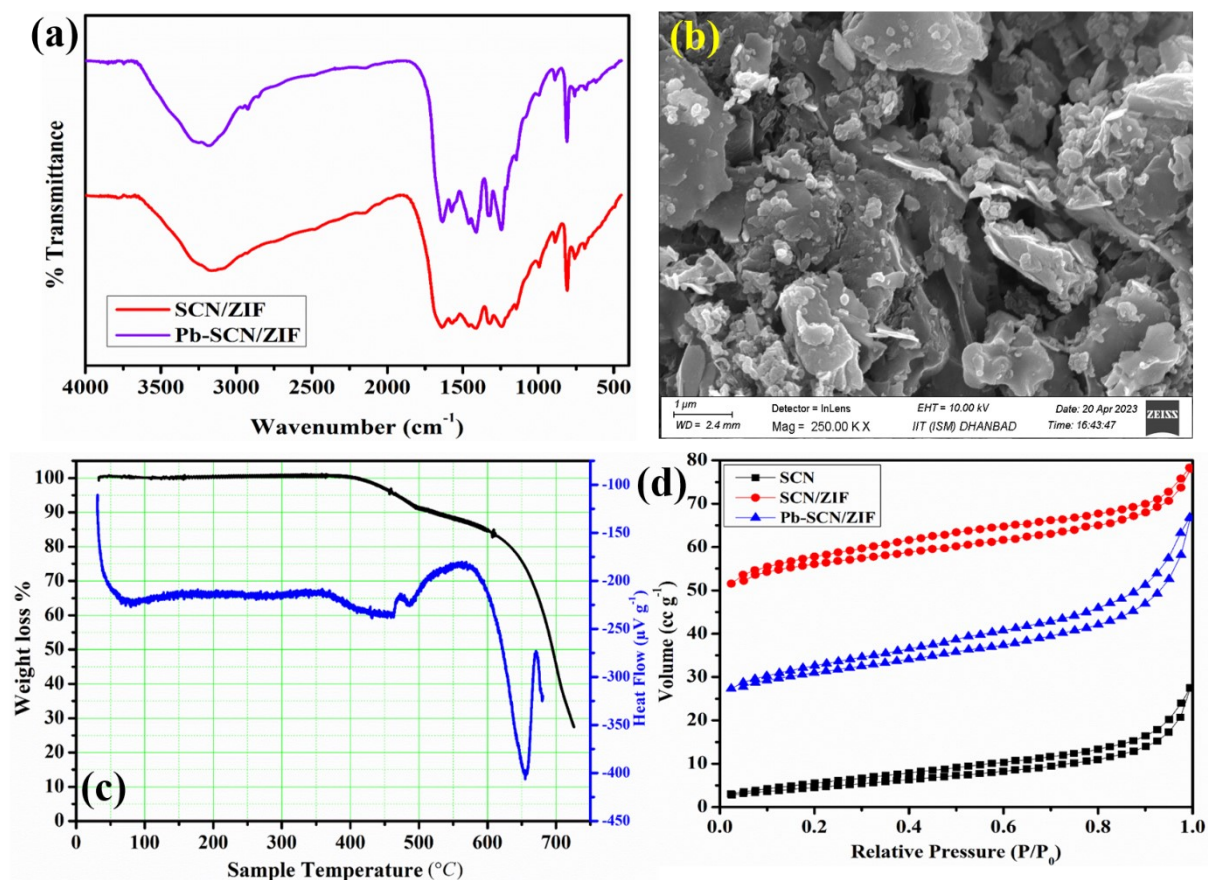

**Figure S2:** (a) FTIR plot of adsorbent before and after adsorption, (b) FESEM image of Pb-SCN/ZIF, (c) TGA of SCN/ZIF composite, and (d) BET analysis of the samples.

**Table S1: BET data of the composites.**

| Sample     | Surface Area<br>(m <sup>2</sup> g <sup>-1</sup> ) | Total Pore volume<br>(cc g <sup>-1</sup> ) | Avg. Pore radius<br>(nm) |
|------------|---------------------------------------------------|--------------------------------------------|--------------------------|
| SCN        | 16.89                                             | 0.576                                      | 4.9                      |
| SCN/ZIF    | 176.6                                             | 0.444                                      | 1.395                    |
| Pb-SCN/ZIF | 100.05                                            | 0.379                                      | 2.095                    |

**Table S2: RAMAN data of the composites.**

| Sample       | D band (cm <sup>-1</sup> ) | G band (cm <sup>-1</sup> ) | I <sub>D</sub> /I <sub>G</sub> ratio |
|--------------|----------------------------|----------------------------|--------------------------------------|
| Carbon@ZIF   | 1336                       | 1582                       | 1.04                                 |
| H@SCN/ZIF    | 1323                       | 1585                       | 1.03                                 |
| H@Pb-SCN/ZIF | 1322                       | 1580                       | 1.07                                 |

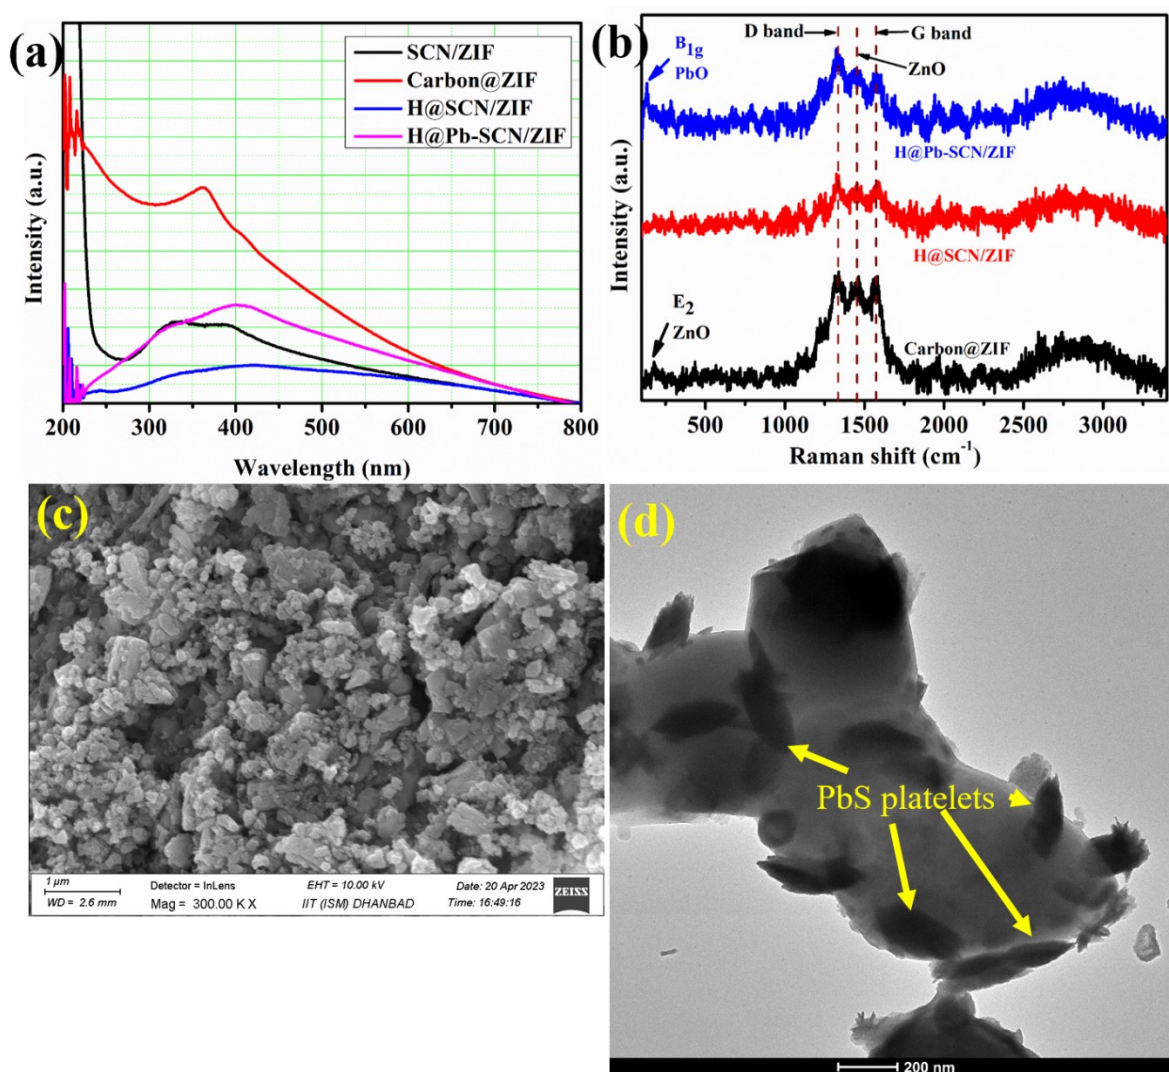

Figure S3: (a) UV-Vis analysis of after heat treatment composites, (b) RAMAN analysis of after heat treatment composites, (c) FESEM image of Carbon@ZIF, and (d) HRTEM image of H@Pb-SCN/ZIF.

### S3. Electrochemical study

#### S3.1. Trasatti method analysis:

The following steps are obeyed for this theoretical analysis. The corresponding areal capacitance of H@Pb-SCN/ZIF was calculated using the following equation:

$$C = \frac{S}{2 \cdot \Delta V \cdot v} \text{ (Equation S1)}$$

Where, C is the areal capacitance in F cm<sup>-2</sup>, ΔV is the voltage window in V, v is the scan rate in V s<sup>-1</sup> and S is the area enclosed by the corresponding cyclic voltammograms in A V cm<sup>-2</sup>. Reciprocal of the calculated areal capacitances (C<sup>-1</sup>) and the square root of the scan rates (v<sup>-1/2</sup>) should be in linear co-relationship assuming ion diffusion follows a semi-infinite diffusion pattern [2].

$$C^{-1} = \text{Constant} \cdot v^{1/2} + C_T^{-1} \text{ (Equation S2)}$$

Where is C<sub>T</sub> the total capacitance, which can be considered as the sum of electron double-layer capacitance and pseudocapacitance and can be calculated from intercept of the Y-axis of C<sup>-1</sup> and v<sup>1/2</sup> plot [3]. Again, calculated areal capacitances show linear relationship with the reciprocal of the square root of the scan rates assuming a semi-infinite diffusion pattern [4].

$$C = \text{Constant} \cdot v^{-1/2} + C_{EDL} \text{ (Equation S3)}$$

Here, C<sub>EDL</sub> is the maximum electron double layer capacitance and it can be calculated from intercept in Y-axis of plot of C and v<sup>-1/2</sup> [3]. Subtracting the electron double layer capacitance (C<sub>EDL</sub>) from total capacitance (C<sub>T</sub>) gives the maximum pseudocapacitance (C<sub>PS</sub>). So the capacitance contribution can be calculated by using the following equation:

$$C_{EDL} \% = \frac{C_{EDL}}{C_T} \times 100 \text{ (Equation S4)}$$

$$C_{PS} \% = \frac{C_{PS}}{C_T} \times 100 \text{ (Equation S5)}$$

Table S3:  $C_{sp}$  of H@Pb-SCN/ZIF at different scan rates in 0 to -0.65 V voltage window in 3-electrode.

| Current density ( $A g^{-1}$ ) | $C_{sp}$ ( $F g^{-1}$ ) |
|--------------------------------|-------------------------|
| 2                              | 2052                    |
| 3                              | 970                     |
| 4                              | 800                     |
| 5                              | 707                     |
| 10                             | 570                     |

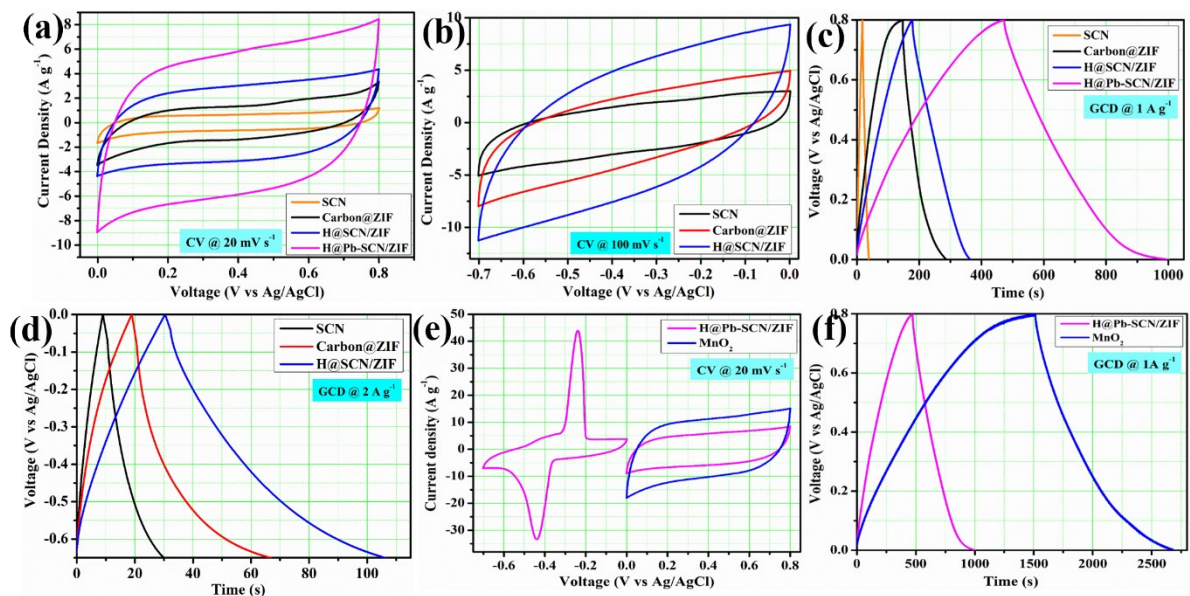

Figure S4: (a) CV comparison of the samples in 0 to 0.8 V, (b) CV comparison of the samples in 0 to -0.7 V, (c) GCD comparison of the samples in 0 to 0.8 V, (d) GCD comparison of the samples in 0 to -0.7 V, (e) CV of  $MnO_2$  compared to H@Pb-SCN/ZIF, and (f) GCD of  $MnO_2$  compared to H@Pb-SCN/ZIF

$$\frac{m_+}{m_-} = \frac{C_{sp-} \times \Delta V_-}{C_{sp+} \times \Delta V_+} \quad (S1)$$

Where,  $C_{sp+}$  and  $C_{sp-}$  are the specific capacitance of the devices in  $Wh kg^{-1}$  for the material used in cathode and anode, respectively calculated in 3-electrode study, while  $\Delta V_+$  and  $\Delta V_-$  are the voltage window of the material used in cathode and anode, respectively in 3-electrode study.

**Table S4:  $C_{sp}$ , ED and PD of supercapacitor at different voltage window.**

| <b>Potential Window<br/>(V)</b> | <b><math>C_{sp}</math><br/>(F g<sup>-1</sup>)</b> | <b>ED<br/>(Wh kg<sup>-1</sup>)</b> | <b>PD<br/>(W kg<sup>-1</sup>)</b> |
|---------------------------------|---------------------------------------------------|------------------------------------|-----------------------------------|
| 0.8                             | 27                                                | 2.4                                | 800                               |
| 1                               | 47                                                | 6.6                                | 1000                              |
| 1.2                             | 121                                               | 24.3                               | 1200                              |
| 1.4                             | 193                                               | 52.7                               | 1400                              |
| 1.5                             | 225                                               | 70.4                               | 1500                              |

**Table S5:  $C_{sp}$ , ED and PD of supercapacitor at different current density.**

| <b>Current density<br/>(A g<sup>-1</sup>)</b> | <b><math>C_{sp}</math><br/>(F g<sup>-1</sup>)</b> | <b>ED<br/>(Wh kg<sup>-1</sup>)</b> | <b>PD<br/>(W kg<sup>-1</sup>)</b> |
|-----------------------------------------------|---------------------------------------------------|------------------------------------|-----------------------------------|
| 0.5                                           | 364                                               | 113.7                              | 750                               |
| 1                                             | 225                                               | 70.4                               | 1500                              |
| 2                                             | 134                                               | 41.9                               | 3000                              |
| 3                                             | 68                                                | 21.3                               | 4500                              |
| 4                                             | 43                                                | 13.3                               | 6000                              |

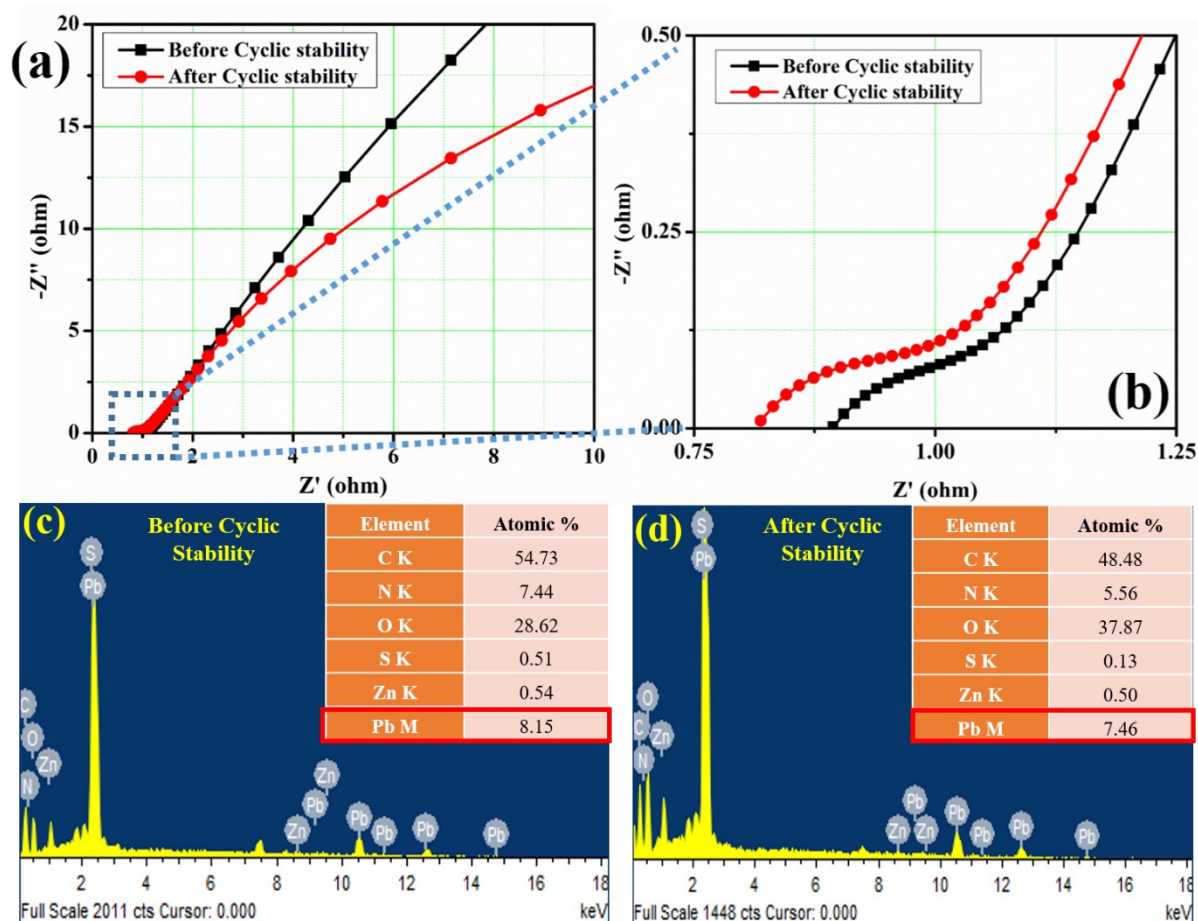

Figure S5: (a) and (b) EIS analysis of the supercapacitor before and after cyclic stability, and FESEM-EDX analysis of the electrodes (c) Before cyclic stability, and (d) After cyclic stability analysis.

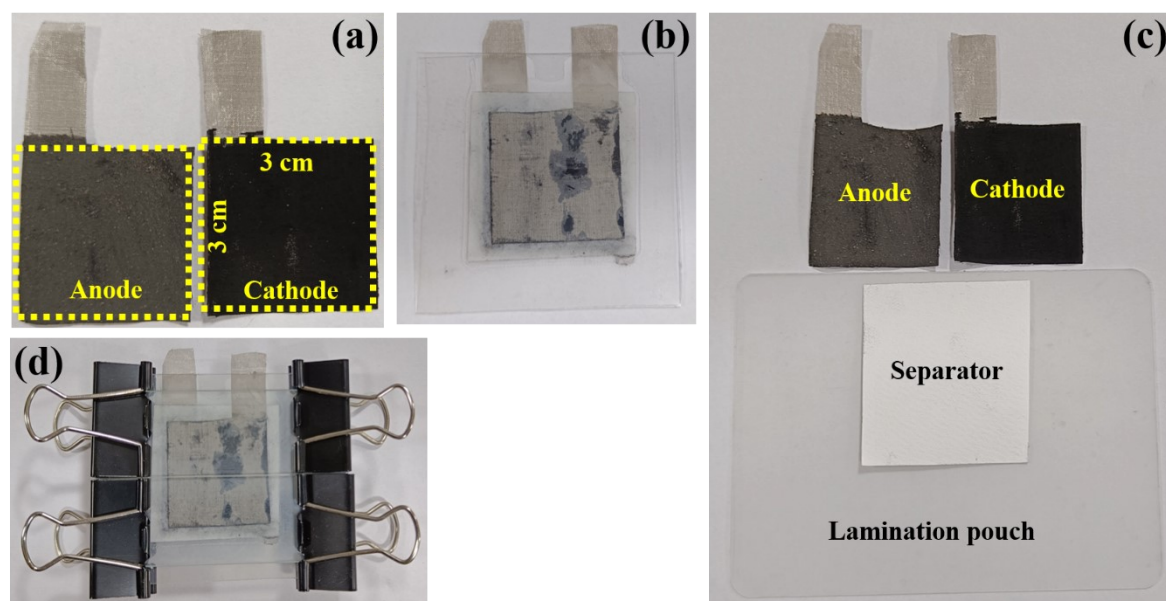

Figure S6: (a) Coated electrodes, (b) Fabricated device, (c) Components of the supercapacitor, and (d) Device as used for electrochemical testing.

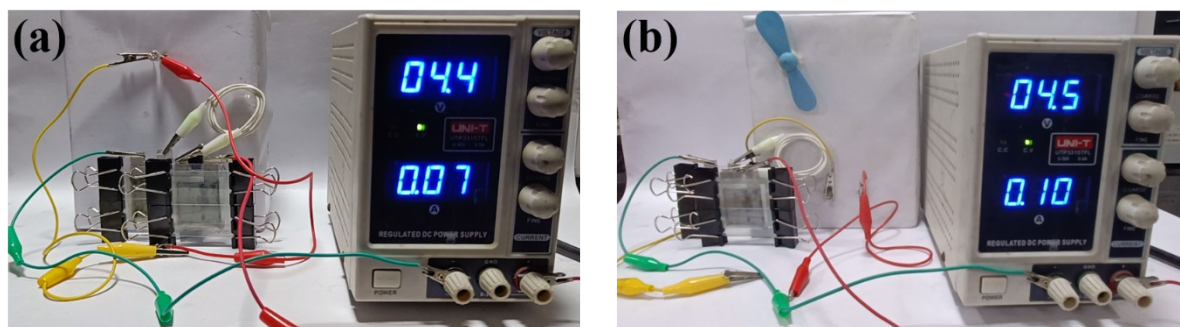

Figure S7: (a) Charging setup for glowing green LED, and (b) Charging setup for operating 2 V DC fan.

Table S6: Comparison of the fabricated supercapacitor with recently reported devices.

| Sample                                         | Electrolyte                      | Voltage window (V) | Current density ( $A g^{-1}$ ) | $C_{sp}$ ( $F g^{-1}$ ) | ED ( $Wh kg^{-1}$ ) | PD ( $W kg^{-1}$ ) | Cyclic stability                                            | Ref.             |
|------------------------------------------------|----------------------------------|--------------------|--------------------------------|-------------------------|---------------------|--------------------|-------------------------------------------------------------|------------------|
| $MnO_2$ - $FeSe_2$ //AC                        | KOH                              | 1.7                | 1                              | 148                     | 55.39               | 850                | 95 % after 10000 cycles                                     | [5]              |
| 3D-C- $NiCo_2O_4$ /Ni//3D- $Fe_3S_4@NiCo$ /SS  | 2 M KOH                          | 1.6                | 1                              | 150                     | 49.8                | 782                | 70 % after 10000 cycles                                     | [6]              |
| Cu-MOF//AC                                     | 1 M KOH                          | 1.8                | 0.6                            | 173.4                   | 41                  | 2400               | 92 % after 1000 cycles                                      | [7]              |
| $Cu_{0.27}Co_{2.73}O_4$ //AC                   | 1 M KOH                          | 1.6                | 0.5                            | 100.6                   | 35.78               | 400                | 86.9 % after 20000 cycles at 5 $A g^{-1}$                   | [8]              |
| $FeP_2/Co_2P/Ni$ //AC                          | 6 M KOH                          | 1.6                | 0.5                            | 46 $mAh g^{-1}$         | 41.2                | 445                | 91 % after 10000 cycles at 5 $A g^{-1}$                     | [9]              |
| $MnO_{2-x}@CoS$ //Porous Carbon                | 3 M KOH                          | 1.7                | 0.7                            | 147 $C g^{-1}$          | 34.72               | 597.24             | 89.6 % after 9000 cycles at 4 $A g^{-1}$                    | [10]             |
| $Fe_2O_3@α-Ni(OH)_2$ //AC                      | 1 M KOH                          | 1.4                | 1                              | 63.3 $C g^{-1}$         | 44.51               | 2465               | 90.5 % after 4000 cycles at 10 $A g^{-1}$                   | [11]             |
| TiN/C//TiC/C                                   | 1 M $Na_2SO_4$                   | 1.8                | 0.5                            | 103                     | 45.2                | 535.2              | 83 % after 4000 cycles                                      | [12]             |
| <b><math>MnO_2</math>//Pb saturated sample</b> | <b>1 M <math>Na_2SO_4</math></b> | <b>1.5</b>         | <b>0.5</b>                     | <b>364</b>              | <b>113.7</b>        | <b>750</b>         | <b>108 % after 10000 cycles at 10 <math>A g^{-1}</math></b> | <b>This Work</b> |

NB: Device denoted as Positive electrode//Negative Electrode.



## Reference:

- [1] Y. Liu, P. Zhang, J. Zhan, and L. Liu, Heat treatment of  $\text{MnCO}_3$ : An easy way to obtain efficient and stable  $\text{MnO}_2$  for humid  $\text{O}_3$  decomposition, 463 (2019) 374-385.
- [2] S. Ardizzone, G. Fregonara, and S. Trasatti, "Inner" and "outer" active surface of  $\text{RuO}_2$  electrodes, 35(1) (1990) 263-267.
- [3] Y.H. Lee, K.H. Chang, and C.C. Hu, Differentiate the pseudocapacitance and double-layer capacitance contributions for nitrogen-doped reduced graphene oxide in acidic and alkaline electrolytes, 227 (2013) 300-308.
- [4] J. Duay, S.A. Sherrill, Z. Gui, E. Gillette, and S.B. Lee, Self-limiting electrodeposition of hierarchical  $\text{MnO}_2$  and  $\text{M}(\text{OH})_2/\text{MnO}_2$  nanofibril/nanowires: mechanism and supercapacitor properties, 7(2) (2013) 1200-1214.
- [5] S.A. Ahmad, M.Z.U. Shah, M. Arif, M.S.U. Shah, E. Ullah, A. Shah, M. Sajjad, J. Aftab, and P. Song, Rational design of a novel  $\text{MnO}_2$ - $\text{FeSe}_2$  nanohybrid with nanowires/cubic architecture as promising supercapattery electrode materials, 936 (2023) 117318.
- [6] N. Swain, S. Balasubramaniam, and A. Ramadoss, High energy density supercapattery empowered by efficient binder-free three-dimensional carbon coated  $\text{NiCo}_2\text{O}_4/\text{Ni}$  battery and  $\text{Fe}_3\text{S}_4@ \text{NiCo}$  pseudocapacitive electrodes, 58 (2023) 106220.
- [7] M. Shaheen, M.Z. Iqbal, M.W. Khan, S. Siddique, S. Aftab, and S.M. Wabaidur, Fuels, Evaluation of a Redox-Active Cu-MOF and Co-MOF as Electrode Materials for Battery–Supercapacitor-Type Hybrid Energy Storage Devices, 37(5) (2023) 4000-4009.
- [8] S. Raj, P. Kar, and P. Roy, Facile synthesis of flower-like morphology  $\text{Cu}_{0.27}\text{Co}_{2.73}\text{O}_4$  for a high-performance supercapattery with extraordinary cycling stability, 54(87) (2018) 12400-12403.
- [9] R. Manikandan, A.D. Savariraj, G. Nagaraju, A. Kale, J. Puigdollers, H. Park, H.S. Kim, J.M. Oh, C.J. Raj, and B.C. Kim, Mixed-phase composites derived from cobalt terephthalate as efficient battery-type electrodes for high-performance supercapattery, 157 (2023) 220-233.
- [10] Q. Hu, M. Tang, M. He, N. Jiang, C. Xu, D. Lin, and Q. Zheng, Core-shell  $\text{MnO}_2@ \text{CoS}$  nanosheets with oxygen vacancies for high-performance supercapattery, 446 (2020) 227335.
- [11] S.K. Babu, and B. Gunasekaran, Ultrathin  $\alpha$ - $\text{Ni}(\text{OH})_2$  nanosheets coated on MOF-derived  $\text{Fe}_2\text{O}_3$  nanorods as a potential electrode for solid-state hybrid supercapattery device, 447 (2023) 142146.

[12] W. Liu, J.L. Cheong, M.F. Ng, and J.Y. Ying, Carbon Nitride Mediated Synthesis of Titanium-Based Electrodes for High-Performance Asymmetric Supercapacitors, (2023) 108489.
